# Supplementary material
Source: PubMed Central journal article supplement (PMC9153082)
Supplement: NIHMS1802484-supplement-Table_S2.pdf [file NIHMS1802484-supplement-Table_S2.pdf]

**Table S2. Log<sub>2</sub> transformed values (from transcriptomics analysis) of Dro-GFP transgenic flies after *P.e.* infection. Related to Figure 1.**

| <b>Drosocin-GFP</b>                             |        |              |              |              |              |         |              |              |              |              |
|-------------------------------------------------|--------|--------------|--------------|--------------|--------------|---------|--------------|--------------|--------------|--------------|
|                                                 | Mock   | <i>P.e.</i>  |              | Fold Change  |              | Mock    | <i>P.e.</i>  |              | Fold Change  |              |
|                                                 |        | GFP Positive | GFP negative | GFP Positive | GFP negative |         | GFP Positive | GFP negative | GFP Positive | GFP negative |
| <b>Gene Name</b>                                | Thorax | Thorax       | Thorax       | Thorax       | Thorax       | Carcass | Carcass      | Carcass      | Carcass      | Carcass      |
| <b>IMD/Relish-innate immune signaling genes</b> |        |              |              |              |              |         |              |              |              |              |
| Rel                                             | 0.6641 | 1.74434      | 1.33271      | 2.62678      | 2.0069       | 0.7261  | 2.30241      | 1.63449      | 3.17095      | 2.25107      |
| IM23                                            | 0.2947 | 2.27848      | 0.83957      | 7.7304       | 2.84848      | 0.33864 | 2.84344      | 1.27129      | 8.39666      | 3.75412      |
| IM1                                             | 0.3756 | 1.83951      | 0.78632      | 4.89689      | 2.09323      | 0.63201 | 2.74924      | 1.53656      | 4.34997      | 2.43122      |
| PGRP-SD                                         | 0.7597 | 2.66682      | 1.65558      | 3.51037      | 2.17926      | 0.79595 | 1.625        | 1.12771      | 2.04158      | 1.41681      |
| PGRP-SB1                                        | 0.741  | 2.43893      | 1.70084      | 3.29154      | 2.29543      | 1.10511 | 3.69344      | 1.68711      | 3.34216      | 1.52665      |
| Dro                                             | 0.2811 | 9.29406      | 1.5723       | 33.058       | 5.59249      | 0.1621  | 11.2613      | 0.70112      | 69.472       | 4.32528      |
| DptA                                            | 0.1261 | 6.71797      | 0.98885      | 53.2772      | 7.84213      | 0.14975 | 11.8902      | 0.98866      | 79.4017      | 6.60216      |
| CecA1                                           | 0.1799 | 10.4263      | 2.4987       | 57.9673      | 13.8921      | 0.29764 | 15.6227      | 0.74721      | 52.489       | 2.51049      |
| CecA2                                           | 0.1642 | 5.17037      | 1.53727      | 31.4822      | 9.3604       | 0.21343 | 7.82645      | 0.64893      | 36.67        | 3.04047      |
| AttA                                            | 0.4789 | 13.1374      | 5.29903      | 27.4317      | 11.0647      | 0.67858 | 19.0354      | 2.78247      | 28.0518      | 4.10043      |
| AttC                                            | 0.4733 | 5.64338      | 2.29684      | 11.9237      | 4.85292      | 1.02061 | 9.89298      | 1.79789      | 9.69319      | 1.76158      |
| <b>Stress responses genes</b>                   |        |              |              |              |              |         |              |              |              |              |
| Sid                                             | 0.3639 | 1.43028      | 1.32315      | 3.9305       | 3.63611      | 0.41318 | 3.00354      | 2.33249      | 7.26939      | 5.64526      |
| Tsf1                                            | 0.7473 | 1.33398      | 1.53202      | 1.78502      | 2.05001      | 0.93664 | 2.11866      | 2.14625      | 2.26199      | 2.29145      |
| stv                                             | 1.1862 | 2.65558      | 2.59521      | 2.23868      | 2.18779      | 0.45664 | 1.02332      | 1.7362       | 2.24099      | 3.80213      |
| Tep1                                            | 0.8761 | 1.2781       | 3.81926      | 1.45884      | 4.35935      | 0.32161 | 0.8258       | 1.16552      | 2.56772      | 3.62405      |
| Hsp26                                           | 0.4296 | 0.71985      | 2.74778      | 1.67555      | 6.39585      | 1.48197 | 1.23368      | 8.6041       | 0.83246      | 5.80587      |
| Hsp23                                           | 1.1155 | 3.1801       | 4.24486      | 2.85082      | 3.80532      | 0.71999 | 5.9496       | 9.42891      | 8.26347      | 13.0959      |
| Hsp68                                           | 0.5871 | 2.15709      | 4.36674      | 3.67409      | 7.43773      | 0.86541 | 1.62242      | 11.9217      | 1.87473      | 13.7758      |
| Hsp27                                           | 0.4689 | 1.53397      | 4.87959      | 3.27136      | 10.4062      | 3.50042 | 4.23709      | 16.0793      | 1.21045      | 4.59355      |
| Hsp70Aa                                         | 1.5096 | 12.7001      | 7.87547      | 8.41305      | 5.217        | 0.62975 | 0.77517      | 3.4673       | 1.23092      | 5.50588      |
