# Supplementary material
Source: PubMed Central journal article supplement (PMC9153082)
Supplement: NIHMS1802484-supplement-Table_S5.pdf [file NIHMS1802484-supplement-Table_S5.pdf]

**Table S5. Log<sub>2</sub> transformed values (from transcriptomics analysis) of up-regulated genes in carcass fat body. Related to Figure 6.**

|  |  |  |  |  | <b>Act88FGal4&gt;</b>      |             |                                  |             |            |
|--|--|--|--|--|----------------------------|-------------|----------------------------------|-------------|------------|
|  |  |  |  |  | <b>+ (w<sup>118</sup>)</b> |             | <b>UAS-Relish<sup>RNAi</sup></b> |             |            |
|  |  |  |  |  | <b>NAME</b>                | <b>Mock</b> | <b>P.e</b>                       | <b>Mock</b> | <b>P.e</b> |
|  |  |  |  |  | CR13656                    | 1.174665    | 1.503366                         | 1.678597    | 33.3871    |
|  |  |  |  |  | CG42833                    | 0.813048    | 1.715345                         | 2.596638    | 48.76074   |
|  |  |  |  |  | CG30016                    | 1.296597    | 1.345588                         | 3.020899    | 21.64778   |
|  |  |  |  |  | Smtv                       | 1.473052    | 3.39187                          | 5.664649    | 48.16446   |
|  |  |  |  |  | CG17636                    | 1.150366    | 1.456942                         | 1.747786    | 18.99977   |
|  |  |  |  |  | CG7084                     | 0.715938    | 0.769761                         | 1.516448    | 9.542681   |
|  |  |  |  |  | st                         | 2.381429    | 2.453818                         | 2.891543    | 28.4573    |
|  |  |  |  |  | CG12963                    | 1.469231    | 1.667417                         | 2.137223    | 18.28288   |
|  |  |  |  |  | CG9259                     | 4.224179    | 4.238015                         | 9.911594    | 43.45065   |
|  |  |  |  |  | CG10514                    | 1.252877    | 1.288059                         | 1.652918    | 11.4792    |
|  |  |  |  |  | Oatp58Dc                   | 0.45431     | 0.750244                         | 0.951792    | 6.570859   |
|  |  |  |  |  | CG18268                    | 0.935881    | 1.40173                          | 1.896238    | 12.11678   |
|  |  |  |  |  | CG8028                     | 0.986867    | 1.674033                         | 3.221094    | 13.53937   |
|  |  |  |  |  | CG34426                    | 1.713029    | 3.266527                         | 3.930958    | 24.67335   |
|  |  |  |  |  | CG7882                     | 2.23434     | 2.986395                         | 3.180877    | 18.98254   |
|  |  |  |  |  | ZnT35C                     | 0.949068    | 1.129181                         | 1.701061    | 6.911943   |
|  |  |  |  |  | CG2187                     | 1.553969    | 2.702799                         | 4.257118    | 16.40139   |
|  |  |  |  |  | CG17752                    | 2.597114    | 4.817077                         | 5.629266    | 28.61526   |
|  |  |  |  |  | salt                       | 3.450242    | 6.476846                         | 6.83704     | 29.69235   |
|  |  |  |  |  | CG7992                     | 1.730423    | 1.754078                         | 2.222426    | 7.67839    |
|  |  |  |  |  | CG7059                     | 0.496968    | 0.600063                         | 0.812752    | 2.557583   |
|  |  |  |  |  | CG32023                    | 2.312572    | 3.371491                         | 4.288483    | 13.29728   |
|  |  |  |  |  | CG14292                    | 6.544424    | 7.119538                         | 7.311703    | 28.07277   |
|  |  |  |  |  | CG12824                    | 0.672631    | 1.48668                          | 1.645876    | 5.834225   |
|  |  |  |  |  | CG13313                    | 0.668614    | 1.165679                         | 1.527494    | 4.554517   |
|  |  |  |  |  | CG15406                    | 4.048514    | 6.947399                         | 6.995157    | 27.09469   |
|  |  |  |  |  | CG10553                    | 0.432928    | 0.508024                         | 0.606424    | 1.945458   |
|  |  |  |  |  | w                          | 0.290332    | 0.307863                         | 0.449868    | 0.872462   |
|  |  |  |  |  | spo                        | 0.789053    | 0.963718                         | 1.256059    | 2.585646   |
|  |  |  |  |  | CG1139                     | 0.746938    | 0.520791                         | 0.790945    | 10.52312   |
|  |  |  |  |  | CG31198                    | 1.194381    | 0.875596                         | 2.008019    | 37.75089   |
|  |  |  |  |  | CG17751                    | 2.579137    | 1.326834                         | 5.156864    | 22.34305   |
|  |  |  |  |  | CG33511                    | 1.848253    | 1.380378                         | 1.97305     | 22.77201   |
|  |  |  |  |  | Alp2                       | 2.087181    | 2.011044                         | 2.776981    | 27.81395   |
|  |  |  |  |  | CG2680                     | 0.76885     | 0.606882                         | 1.203108    | 6.205963   |
|  |  |  |  |  | CG13992                    | 0.725676    | 0.520455                         | 2.163681    | 5.203886   |
|  |  |  |  |  | CG16727                    | 2.354466    | 1.807986                         | 2.710301    | 16.99936   |
|  |  |  |  |  | Oatp58Db                   | 1.30146     | 1.014766                         | 1.370291    | 8.860817   |
|  |  |  |  |  | alphaTry                   | 0.884623    | 0.621675                         | 1.262224    | 4.776111   |
|  |  |  |  |  | CG11892                    | 1.803221    | 1.376588                         | 2.099885    | 8.584007   |
|  |  |  |  |  | CG42235                    | 1.417548    | 1.16637                          | 1.43633     | 6.958745   |
|  |  |  |  |  | CG9509                     | 3.398187    | 3.144176                         | 5.595323    | 16.38888   |
|  |  |  |  |  | CG7968                     | 1.110821    | 0.773996                         | 2.113824    | 4.008621   |
|  |  |  |  |  | Jon65Aiii                  | 0.990118    | 0.723852                         | 1.232972    | 3.636168   |
|  |  |  |  |  | CG33282                    | 0.76817     | 0.741951                         | 1.365004    | 3.648482   |

|  |            |          |          |          |          |
|--|------------|----------|----------|----------|----------|
|  | Inx7       | 1.222124 | 0.698508 | 1.226578 | 3.292074 |
|  | Cln3       | 0.255033 | 0.220525 | 0.330483 | 1.006098 |
|  | osk        | 2.245071 | 1.913675 | 7.730237 | 8.706071 |
|  | CG32107    | 0.64651  | 0.621833 | 1.437453 | 2.80965  |
|  | CG7142     | 1.077063 | 0.819142 | 1.209661 | 3.590437 |
|  | MFS12      | 0.694439 | 0.66636  | 1.235578 | 2.864275 |
|  | nemy       | 0.943834 | 0.644974 | 0.995025 | 2.771056 |
|  | CG14949    | 0.622028 | 0.545202 | 0.831106 | 2.284964 |
|  | Akh        | 1.740543 | 1.543584 | 2.279448 | 6.351976 |
|  | CG6733     | 0.83333  | 0.804067 | 1.067771 | 3.148257 |
|  | vanin-like | 1.191582 | 0.900852 | 2.038113 | 3.429715 |
|  | ct         | 0.622386 | 0.469524 | 0.724033 | 1.536024 |
|  | GATAe      | 1.26135  | 1.152355 | 1.735737 | 3.026781 |
|  | pip        | 0.693422 | 0.67289  | 0.925612 | 1.631071 |
|  | Elk        | 0.648129 | 0.566505 | 0.771158 | 1.359766 |
|  | Cyp310a1   | 0.745282 | 0.692848 | 0.778282 | 1.576369 |
|  | CG34043    | 2.160265 | 4.86125  | 2.036283 | 28.09093 |
|  | Oatp58Da   | 2.263138 | 2.356753 | 2.018949 | 48.60121 |
|  | CG15043    | 0.481022 | 0.586847 | 0.427123 | 2.492154 |
|  | List       | 0.313838 | 0.81481  | 0.230499 | 3.288484 |
|  | CG5697     | 1.559204 | 1.623442 | 0.858375 | 6.334456 |
|  | Mur18B     | 9.21274  | 9.484035 | 9.096687 | 35.29854 |
|  | CG10513    | 0.465241 | 0.683587 | 0.493104 | 9.19996  |
|  | CG3264     | 0.622445 | 0.846794 | 0.806545 | 130.8011 |
|  | CG3285     | 2.21977  | 3.059494 | 2.36669  | 37.81938 |
|  | CG13309    | 1.858251 | 5.127553 | 3.920266 | 44.60145 |
|  | CG9702     | 1.986176 | 2.510142 | 2.422497 | 20.1745  |
|  | NaPi-T     | 1.7342   | 2.263041 | 2.144758 | 17.36489 |
|  | CG16898    | 0.4014   | 1.047951 | 0.544561 | 7.145693 |
|  | CG11878    | 0.346373 | 2.440338 | 1.197016 | 13.6573  |
|  | CG11893    | 0.148299 | 0.54076  | 0.375576 | 2.931436 |
|  | CG12825    | 0.737467 | 0.97461  | 0.813662 | 4.306569 |
|  | CG9270     | 0.896503 | 1.544249 | 1.227322 | 6.018042 |
|  | Zip71B     | 0.746685 | 1.006166 | 0.904988 | 3.686445 |
|  | CG31106    | 2.445487 | 4.691238 | 2.983623 | 17.17564 |
|  | Ptx1       | 0.566491 | 1.005003 | 0.9426   | 3.655005 |
|  | Tep1       | 0.398757 | 0.788254 | 0.500116 | 2.461486 |
|  | GstD5      | 0.204553 | 2.357704 | 0.237626 | 6.748672 |
|  | Cyp6a16    | 0.524331 | 0.92264  | 0.784246 | 1.716186 |
|  | CG14606    | 0.967277 | 0.874739 | 0.599527 | 66.73968 |
|  | CG15221    | 0.689778 | 0.650151 | 0.633295 | 64.45887 |
|  | CG33258    | 0.663341 | 0.59027  | 0.561409 | 35.92545 |
|  | CG14195    | 1.879676 | 1.789187 | 1.309461 | 27.84086 |
|  | Uro        | 4.510942 | 4.020115 | 3.272581 | 40.17975 |
|  | CG16762    | 8.15057  | 1.683164 | 0.567135 | 14.87688 |
|  | CG10911    | 0.614795 | 0.581314 | 0.567601 | 4.114934 |
|  | CG12374    | 0.958464 | 0.679757 | 0.668237 | 3.945362 |
|  | Scp2       | 1.057194 | 0.322417 | 0.280796 | 1.819757 |
|  | Bace       | 0.8232   | 0.799107 | 0.788904 | 4.357782 |
|  | Decay      | 1.104461 | 0.989277 | 0.773185 | 5.382483 |
|  | betaTry    | 0.782778 | 0.756883 | 0.745969 | 4.111453 |
